# Supplementary material for: High Maternal Omega-3 Supplementation Dysregulates Body Weight and Leptin in Newborn Male and Female Rats: Implications for Hypothalamic Developmental Programming
Source: PubMed Central journal article supplement (PMC7823471; doi:10.3390/nu13010089), 2020-12-30
Supplement: nutrients-13-00089-s001.pdf [file nutrients-13-00089-s001.pdf]

**Supplementary Table 1. Brain fatty acid composition (% total fatty acids; male offspring).**

| Pre-conception diet  | Chow       |                 |                 | HFSD            |                 |
|----------------------|------------|-----------------|-----------------|-----------------|-----------------|
| Post-conception diet | Chow       | $\omega$ 3      | HFSD            | Chow            | $\omega$ 3      |
| C16:0                | 33.1 ± 0.4 | 29.9 ± 0.8 *    | 32.0 ± 0.7      | 31.3 ± 0.2      | 30.3 ± 1.0 *    |
| C16:1 $\omega$ -7    | 2.1 ± 0.1  | 2.3 ± 0.1       | 2.2 ± 0.1       | 2.1 ± 0.1       | 2.1 ± 0.1       |
| C18:0                | 16.9 ± 0.3 | 16.4 ± 0.6      | 16.4 ± 0.5      | 16.6 ± 0.1      | 15.5 ± 0.7      |
| C18:1 $\omega$ -9    | 12.6 ± 0.3 | 13.1 ± 0.4      | 12.6 ± 0.3      | 12.6 ± 0.2      | 13.2 ± 0.5      |
| C18:2 $\omega$ -6    | 0.9 ± 0.0  | 0.6 ± 0.0 *, \$ | 0.6 ± 0.0 *, \$ | 0.9 ± 0.0       | 0.5 ± 0.1 *, \$ |
| C20:1 $\omega$ -9    | 0.2 ± 0.0  | 0.2 ± 0.0       | 0.2 ± 0.0       | 0.2 ± 0.0       | 0.2 ± 0.1       |
| C20:2 $\omega$ -6    | 0.2 ± 0.0  | 0.0 ± 0.0       | 0.1 ± 0.1       | 0.1 ± 0.1       | 0.0 ± 0.0       |
| C20:3 $\omega$ -6    | 0.5 ± 0.0  | 0.4 ± 0.0       | 0.4 ± 0.0       | 0.5 ± 0.0       | 0.4 ± 0.0       |
| C20:4 $\omega$ -6    | 12.9 ± 0.3 | 9.3 ± 0.2 *     | 14.0 ± 0.6 ^, “ | 14.0 ± 0.2 ^, “ | 9.4 ± 0.6 *     |
| C20:5 $\omega$ -3    | 0.2 ± 0.1  | 1.1 ± 0.1 *     | 0.1 ± 0.1 ^, “  | 0.2 ± 0.1 ^, “  | 1.2 ± 0.2 *     |
| C22:1 $\omega$ -9    | 0.2 ± 0.1  | 0.1 ± 0.1       | 0.2 ± 0.1       | 0.1 ± 0.1       | 0.1 ± 0.1       |
| C22:6 $\omega$ -3    | 13.5 ± 0.6 | 20.0 ± 1.3 *    | 13.8 ± 1.1 ^, “ | 14.8 ± 0.4 ^, “ | 19.2 ± 1.2 *    |
| Total PUFAs          | 43.4 ± 0.7 | 47.4 ± 1.2      | 44.5 ± 1.4      | 45.7 ± 0.5      | 46.6 ± 1.4      |
| Total $\omega$ -3    | 13.7 ± 0.6 | 21.2 ± 1.3 *    | 13.9 ± 1.1 ^, “ | 15.0 ± 0.4 ^, “ | 20.3 ± 1.3 *    |
| Total $\omega$ -6    | 14.8 ± 0.4 | 10.6 ± 0.3 *    | 15.0 ± 0.6 ^, “ | 15.8 ± 0.2 ^, “ | 10.6 ± 0.6 *    |
| Total $\omega$ -9    | 12.9 ± 0.3 | 13.4 ± 0.5      | 12.9 ± 0.4      | 12.9 ± 0.2      | 13.6 ± 0.6      |

HFSD: high-fat-high-sugar diet. PUFAs: polyunsaturated fatty acids. Data were analysed by two-way ANOVA followed by Tukey's *post hoc* tests. *Post hoc* differences: \* versus the chow-chow group; ^ versus the chow- $\omega$ 3 group; # versus the HFSD-HFSD group; \$ versus the HFSD-chow group; “ versus the HFSD- $\omega$ 3 group.  $p < 0.05$ . Data are mean ± SEM (n = 4-5 per group).

**Supplementary Table 2. Brain fatty acid composition (% total fatty acids; female offspring).**

| Pre-conception diet            | Chow       |             |                | HFSD           |             |
|--------------------------------|------------|-------------|----------------|----------------|-------------|
| Post-conception diet           | Chow       | $\omega 3$  | HFSD           | Chow           | $\omega 3$  |
| C16:0                          | 35.9 ± 1.9 | 33.2 ± 1.0  | 35.6 ± 1.7     | 38.2 ± 3.3     | 34.1 ± 0.2  |
| C16:1 $\omega$ -7              | 1.8 ± 0.1  | 1.9 ± 0.1   | 2.1 ± 0.2      | 1.7 ± 0.2      | 2.1 ± 0.0   |
| C18:0                          | 20.4 ± 1.7 | 19.3 ± 0.9  | 20.0 ± 1.6     | 21.9 ± 2.2     | 19.4 ± 0.3  |
| C18:1 $\omega$ -9              | 13.7 ± 0.7 | 13.9 ± 0.4  | 13.8 ± 0.7     | 11.7 ± 2.2     | 14.0 ± 0.3  |
| C18:2 $\omega$ -6              | 0.8 ± 0.1  | 0.6 ± 0.0   | 0.6 ± 0.1      | 0.7 ± 0.1      | 0.5 ± 0.0 * |
| C20:1 $\omega$ -9              | 0.2 ± 0.0  | 0.2 ± 0.0   | 0.2 ± 0.0      | 0.1 ± 0.1      | 0.2 ± 0.0   |
| C20:2 $\omega$ -6              | 0.2 ± 0.0  | 0.2 ± 0.0   | 0.2 ± 0.0      | 0.2 ± 0.1      | 0.2 ± 0.0   |
| C20:3 $\omega$ -6              | 0.4 ± 0.1  | 0.4 ± 0.1   | 0.4 ± 0.0      | 0.3 ± 0.2      | 0.4 ± 0.0   |
| C20:4 $\omega$ -6              | 10.0 ± 2.0 | 7.4 ± 0.6   | 10.7 ± 1.6     | 8.6 ± 2.3      | 7.3 ± 0.4   |
| C20:5 $\omega$ -3              | 0.1 ± 0.1  | 0.9 ± 0.1 * | 0.1 ± 0.0 ^, “ | 0.1 ± 0.1 ^, “ | 0.8 ± 0.0 * |
| C22:1 $\omega$ -9              | 0.3 ± 0.1  | 0.2 ± 0.0   | 0.2 ± 0.0      | 0.3 ± 0.1      | 0.3 ± 0.0   |
| C22:6 $\omega$ -3              | 9.7 ± 2.6  | 15.0 ± 1.7  | 9.2 ± 2.2      | 7.9 ± 2.4      | 13.6 ± 0.0  |
| Total PUFAs                    | 37.9 ± 4.0 | 41.4 ± 2.0  | 38.1 ± 3.4     | 32.3 ± 7.1     | 40.0 ± 0.5  |
| Total $\omega$ -3 <sup>m</sup> | 10.0 ± 2.6 | 16.1 ± 1.7  | 9.4 ± 2.2      | 8.1 ± 2.5      | 14.5 ± 0.5  |
| Total $\omega$ -6              | 11.9 ± 2.1 | 9.0 ± 0.6   | 12.3 ± 1.7     | 10.3 ± 2.7     | 8.8 ± 0.4   |
| Total $\omega$ -9              | 14.3 ± 0.8 | 14.4 ± 0.3  | 14.3 ± 0.6     | 12.2 ± 1.9     | 14.7 ± 0.4  |

HFSD: high-fat-high-sugar diet. PUFAs: polyunsaturated fatty acids. Data were analysed by two-way ANOVA followed by Tukey's *post hoc* tests. *Post hoc* differences: \* versus the chow-chow group; ^ versus the chow- $\omega 3$  group; # versus the HFSD-HFSD group; \$ versus the HFSD-chow group; “ versus the HFSD- $\omega 3$  group. m – main effect of pregnancy diet (with no *post hoc* differences).  $p < 0.05$ . Data are mean ± SEM (n = 3-5 per group).
